# Supplementary material
Source: publisher figshare collection journal article supplement (https://plos.figshare.com/articles/dataset/_/4242374)
Supplement: Supplementary file [file 1]

## S4 Text - Methodology of comparing marked duplicates between tools

The duplicate marking step marks the alignments of duplicate reads by setting a specific bit of the SAM format to one for the alignments (bit 0x400 of the FLAG field [1]). We first extract alignments whose duplicate bits are one from the output of each tool to compare the outputs between two tools for duplicate marking.

The next step is to normalize the alignments, which involves three sub-steps: sorting optional fields of the SAM format [1] (e.g., in alphabetical order), removing the optional fields that were added by the tools and are not included in either output, and removing the version of the SAM format.

The last step is file comparison. For example, the `diff` command is available for file comparison in the Linux environment. When `sam2bam` does not emulate the sorting of Picard `SortSam`, the order of the marked alignments in the SAM file is also normalized before file comparison so that the same alignment appears in the same position in the files. For example, the `sort` command is available for this normalization in the Linux environment.

The content of the output files produced by the Picard tools and `sam2bam` included the minor differences that were previously explained, even where the same alignments were marked as duplicates. The Picard `MarkDuplicate` tool changes the order of the optional fields, while `sam2bam` retains the original order since it uses the utility functions of `samtools`, which do not change the order of the optional fields. Also, the Picard `MarkDuplicate` tool adds an optional field to indicate that `MarkDuplicates` has processed the file, while `sam2bam` does not add a `MarkDuplicates`-specific field. In addition, the Picard `MarkDuplicate` tool updates the version number in the header of the output, while `sam2bam` keeps it.

The duplicate marking tools that use the algorithm [2] can find the same set of alignments that include the best alignment and duplicate alignments. The best alignment has the highest base quality while duplicate alignments have base qualities that are lower than the highest base quality. More than a few alignments have the same highest base quality in some cases. Any such alignments can be the best alignment since its base quality is the highest in the alignment set. However, `sam2bam` chooses the same best alignment from multiple candidates just as Picard `MarkDuplicates` does by emulating how Picard `MarkDuplicates` chooses it from an input file that Picard `SortSam` has sorted. Therefore, the data comparison that was previously explained produces no differences if `sam2bam` marks appropriate alignments.

## References

- [1] The SAM/BAM format specification working group. Sequence Alignment/Map Format Specification. 2015 March 3. Available: <http://github.com/samtools/sam-spec>.
- [2] Overview of the `dedup` function of `bamUtil`. Available: [http://genome.sph.umich.edu/wiki/BamUtil:\\_dedup](http://genome.sph.umich.edu/wiki/BamUtil:_dedup).
